# Supplementary material for: Decorin in the spatial control of collagen mineralization
Source: Royal Society of Chemistry journal article supplement (doi:10.1039/d3mh02216a), 2024-01-01
Supplement: d3mh02216a1.pdf [file d3mh02216a1.pdf]

## Supplementary Information

### Decorin in the spatial control of collagen mineralization

Yuming Bai <sup>a,b,c</sup>, Peng Wu <sup>a,b,c</sup>, Qiufang Zhang <sup>a,b,c</sup>, Feng Lin <sup>a,b,c</sup>, Ling Hu <sup>d</sup>, Zhisheng Zhang <sup>a,b,c</sup>, Wenxia Huang <sup>a,b,c</sup>, Yin Xiao <sup>e,f,\*</sup>, Qiliang Zuo <sup>a,b,c,\*</sup>

a. Stomatological Hospital of Xiamen Medical College, Xiamen Medical College, Xiamen, PR China

b. Xiamen Key Laboratory of Stomatological Disease Diagnosis and Treatment, Xiamen, PR China

c. Engineering Research Center of Fujian University for Stomatological Biomaterials, Xiamen, PR China

d. Department of Pharmacy and Pharmaceutical Sciences, Xiamen Medical College, Xiamen, PR China

e. School of Medicine and Dentistry, Griffith University, Gold Coast, Australia.

f. Australia-China Centre for Tissue Engineering and Regenerative Medicine, Brisbane, Australia

\* Corresponding author at:

1. Stomatological Hospital of Xiamen Medical College, Xiamen Medical College, Xiamen, 361000, PR China.

2. School of Medicine and Dentistry, Griffith University, Gold Coast, QLD 4222, Australia.

E-mail addresses: drbaiyuming1977@gmail.com(Yuming Bai), fjxm-wp@126.com (Peng Wu), 563896117@qq.com (Qiufang Zhang), [dentistjojo@126.com](mailto:dentistjojo@126.com)(Feng Lin), 2711442832@qq.com (Ling Hu), 1073842301@qq.com(Zhisheng Zhang), 1043200243@qq.com(Wenxia Huang), [yin.xiao@griffith.edu.au](mailto:yin.xiao@griffith.edu.au)(Yin Xiao), [zuoqiliang1985@sina.com](mailto:zuoqiliang1985@sina.com) (Qiliang Zuo).

### Characterization for the ultrastructure of COL I fibril, pCOL I fibril, DCN crosslinked COL I fibril and DCN crosslinked pCOL I fibril

Grid of recombinant COL I fibril, pCOL I fibril, 1 $\mu$ M DCN crosslinked COL I fibril and 1 $\mu$ M DCN crosslinked pCOL I fibril were stained by uranyl acetate (Electron Microscopy China, China) and examined by TEM (Hitachi HT7700 EXALEN, Japan) at 100 kV.

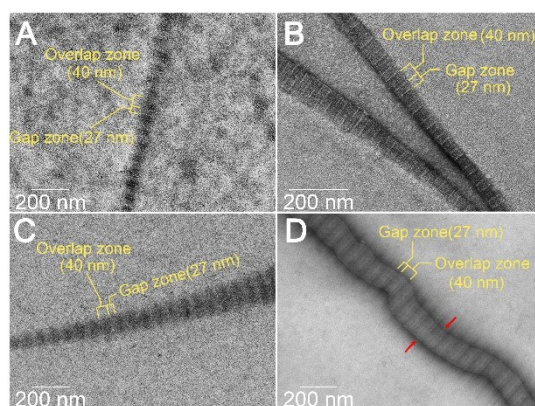

**Fig.S1** Representative TEM images of reconstituted COL I, pCOL I fibril, 1 $\mu$ M DCN crosslinked COL I fibril and 1 $\mu$ M DCN crosslinked pCOL I fibril that stained by uranyl acetate. The cross-banding pattern is most clearly identifiable in the pCOL I fibril (B). The pattern is more apparent in the reconstituted COL I fibril (A) compared to the DCN crosslinked COL I fibril (C), probably due to binding with the negative charged DCN narrowing down the charge difference between gap zone and overlap zone. The outline of the DCN crosslinked pCOL I fibril shows an enhanced electron density, contributing to a tube-like appearance of the fibril (D). Moreover, the band in this fibril, which was previously indexed as the gap zone, becomes a dark region, indicating enrichment of electrons, whereas the overlap zone appears as a light band. Red arrows pointed to the contour of pCOL I fibril, which was enhanced by electron.

### Characterization for 2 $\mu$ M DCN crosslinked COL I and pCOL I fibrils after 72 h mineralization treatment

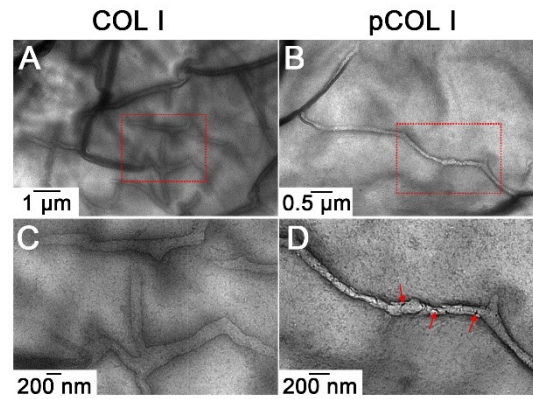

**Fig. S2** Representative TEM images of 2  $\mu\text{M}$  DCN crosslinked COL I and pCOL I fibrils after 72 h of mineralization treatment. A shows ultrastructure of 2  $\mu\text{M}$  DCN crosslinked COL I fibrils after 72 h of mineralization, in which unmineralized fibrils are detected as light strips delineated by an electron-dense profile. B shows ultrastructure of 2  $\mu\text{M}$  DCN crosslinked pCOL I fibrils after 72 h of mineralization, in which unmineralized fibrils are detected as light strips delineated by a higher electron-dense profile. (C, D) Corresponding higher magnification of the rectangle region in A and C, respectively. Red arrows pointed to dots with heave electronic density, which may indicate as mineralization cores on the surface of fibrils.

#### Characterization for 1 $\mu\text{M}$ DCN crosslinked COL I and pCOL I fibrils after 24 h mineralization treatment

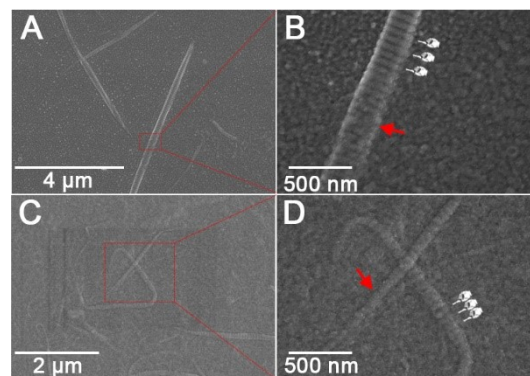

**Fig.S3** Representative SEM images of mineralized DCN-conjugated COL I and pCOL I fibrils. (A) 1  $\mu\text{M}$  DCN crosslinked COL I fibrils after 24 h mineralization treatment. (C) 1  $\mu\text{M}$  DCN crosslinked pCOL I fibrils after 24 h mineralization treatment. (B, D) Corresponding higher magnification of the rectangle region in A and C, respectively. Red arrows pointed to the mineralized part of collagen fibrils. Pointers were indexed

to the cross-banding pattern.
